# Supplementary material
Source: PubMed Central journal article supplement (PMC3536376)
Supplement: JVI.02033-12_zjv999097111so1.pdf [file JVI.02033-12_zjv999097111so1.pdf]

|                                       | 411 | 420 |
|---------------------------------------|-----|-----|
| MVi/Maryland.USA/0.54 [A] *           |     |     |
| MVi/Yaounde.CMR/12.83 [B1] *          |     |     |
| MVi/Libreville.GAB/8.84 [B2]          |     |     |
| MVi/Ibadan.NIE/.97/1 [B3]             |     |     |
| MVi/Massachusetts.USA/26.09 [B3]      |     |     |
| MVi/Tokyo.JPN/0.84 [C1] *             |     |     |
| MVi/Maryland.USA/0.77 [C2] *          |     |     |
| MVi/Erlangen.DEU/0.90 [C2] *          |     |     |
| MVi/Bristol.GBR/0.74 [D1] *           |     |     |
| MVi/Illinois.USA/0.89/1 [D3] *        |     | N   |
| MVi/Kanagawa.JPN/04.84 (IC-B) [D3]    |     | N   |
| MVi/Montreal.CAN/0.89 [D4] *          |     | N   |
| MVi/NewYork.USA/22.09 [D4]            | .I  | N   |
| MVi/Palau/0.93 [D5] *                 |     | N   |
| MVi/Bangkok.THA/0.93/1 [D5] *         |     | N   |
| MVi/Vietnam/29.01 [D5]                |     | N   |
| MVi/New Jersey.USA/0.94/1 [D6] *      |     |     |
| MVi/Victoria.AUS/16.85 [D7] *         |     | N   |
| MVi/Illinois.USA/50.99 [D7] *         |     | N   |
| MVi/Manchester.GBR/30.94 [D8] *       |     |     |
| MVi/Okinawa.JPN/37.09 [D8]            |     |     |
| MVi/Victoria.AUS/12.99 [D9] *         |     | N   |
| MVi/California.USA/5.9 [D9]           |     | N   |
| MVi/Kampala.UGA/51.0/1 [D10] *        |     |     |
| MVi/Menglian.Yunnan.CHN/47.09 [D11] * |     | N   |
| MVi/Goettingen.DEU/0.71 [E] *         |     | R   |
| MVs/Madrid.ESP/0.94 (SSPE) [F] *      |     |     |
| MVi/Berkley.USA/0.83 [G1]             |     |     |
| MVi/Amsterdam.NDL/49.97 [G2] *        |     |     |
| MVi/Gresik.IDN/17.02 [G3] *           |     |     |
| MVi/Hunan.CHN/0.93/7 [H1] *           |     | A   |
| MVi/Pennsylvania.USA/20.09 [H1]       |     | A   |
| MVi/Beijin.CHN/0.94/1 [H2] *          |     | A   |

Figure S1. Amino acid sequence alignment of the H protein. An alignment of the amino acid sequences of residues 411–420 of various MV genotypes is shown. The asterisks indicate WHO reference strains of MV. The red boxes indicate predicted N-linked glycosylation sites.

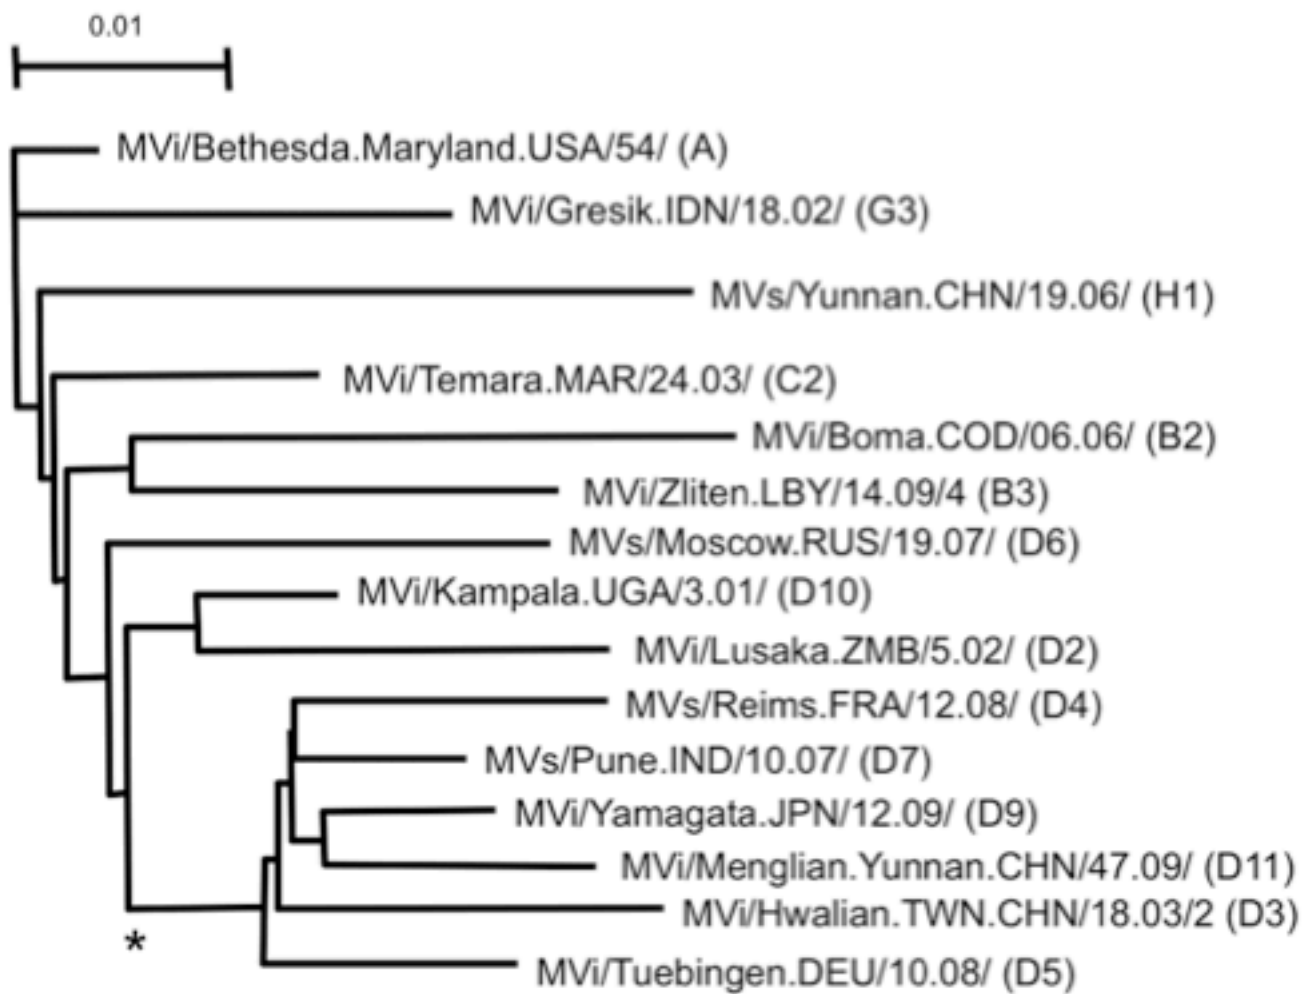

**Figure S2. Phylogenetic tree based on the amino acid sequences of the H protein.** The asterisk indicates the branching point where MV acquired the N-linked sugar at residue 416.

**Supplementary Table 1.** List of recombinant MVs used in the present study

| Virus name in the present study | Backbone genome | Breif description                           | Reference               | Virus name in the reference |
|---------------------------------|-----------------|---------------------------------------------|-------------------------|-----------------------------|
| Genotype D3                     | IC323-Luci      | Entirely genotype D3 virus                  | Takeda et al (2007)     | IC323-Luci                  |
| Genotype A                      | IC323-Luci      | H gene from genotype A                      | Takeda et al (2007)     | IC/Ed-H-Luci                |
| Genotype B3                     | IC323-Luci      | H gene from genotype B3                     | the present study       |                             |
| Genotype D4                     | IC323-Luci      | H gene from genotype D4                     | the present study       |                             |
| Genotype D5                     | IC323-Luci      | H gene from genotype D5                     | the present study       |                             |
| Genotype D8                     | IC323-Luci      | H gene from genotype D8                     | the present study       |                             |
| Genotype D9                     | IC323-Luci      | H gene from genotype D9                     | the present study       |                             |
| Genotype H1                     | IC323-Luci      | H gene from genotype H1                     | the present study       |                             |
| IC323-Luci-H(Q391R)             | IC323-Luci      | Q391R point mutation                        | the present study       |                             |
| IC323-Luci-H(Q311R)             | IC323-Luci      | Q311R point mutation                        | the present study       |                             |
| Genotype D3                     | IC323-EGFP      | Entirely genotype D3 virus                  | Hashimoto et al. (2002) | IC323-EGFP                  |
| Genotype A                      | IC323-EGFP      | H gene for genotype A                       | Hashimoto et al. (2002) | IC323/EdH-EGFP              |
| MV323-EGFP-H-β12(N481Y)         | IC323-EGFP      | a chimeric H gene between genotype A and D3 | Tahara et al. (2007)    | MV323-EGFP-H-β12(N481Y)     |
| MV323-EGFP-H8                   | IC323-EGFP      | a chimeric H gene between genotype A and D3 | Tahara et al. (2007)    | MV323-EGFP-H8               |
| MV323-EGFP-H9                   | IC323-EGFP      | a chimeric H gene between genotype A and D3 | Tahara et al. (2007)    | MV323-EGFP-H9               |
| MV323-EGFP-H10                  | IC323-EGFP      | a chimeric H gene between genotype A and D3 | Tahara et al. (2007)    | MV323-EGFP-H10              |
| MV323-EGFP-H11                  | IC323-EGFP      | a chimeric H gene between genotype A and D3 | Tahara et al. (2007)    | MV323-EGFP-H11              |
| G211S                           | IC/Ed-H-Luci    | G211S point mutation                        | the present study       |                             |
| E235G                           | IC/Ed-H-Luci    | E235G point mutation                        | the present study       |                             |
| Y252H                           | IC/Ed-H-Luci    | Y252H point mutation                        | the present study       |                             |
| L284F                           | IC/Ed-H-Luci    | L284F point mutation                        | the present study       |                             |
| L296F                           | IC/Ed-H-Luci    | L296F point mutation                        | the present study       |                             |
| G302R                           | IC/Ed-H-Luci    | G302R point mutation                        | the present study       |                             |
